# Supplementary material for: Ethanol-guided synthesis of (flower-on-leaf)-like aniline oligomers with excellent adsorption properties
Source: Royal Society of Chemistry journal article supplement (doi:10.1039/c5nj01828e), 2015-01-01
Supplement: c5nj01828e1.pdf [file c5nj01828e1.pdf]

## Supplementary Information

Of

### Ethanol-guided synthesis of (flower-on-leaf)-like aniline oligomers with excellent adsorption properties

Chuanqiang Zhou,<sup>\*a</sup> Xiaxia Li,<sup>a</sup> Xiangxiang Gong,<sup>a,b</sup> Jie Han<sup>\*b</sup> and Rong Guo<sup>b</sup>

<sup>a</sup>Testing center, Yangzhou University, Yangzhou, 225009, Jiangsu, P. R. China. <sup>b</sup>School of Chemistry and Chemical Engineering, Yangzhou University, Yangzhou, 225002, Jiangsu, P. R. China

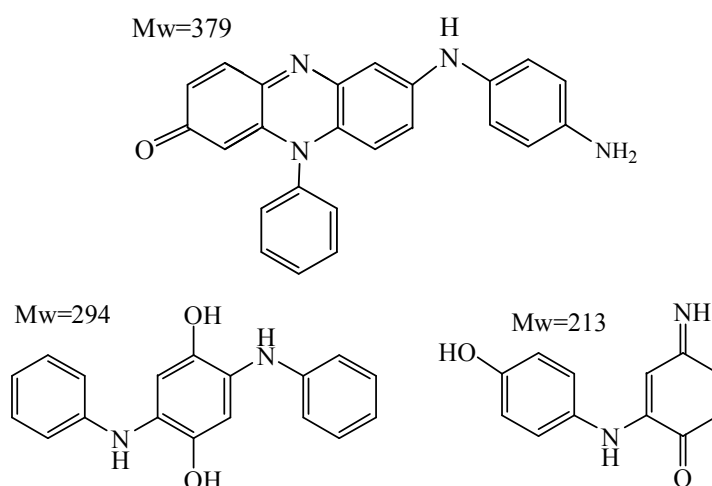

**Figure S1.** Possible molecular structures of oligomers synthesized by 15 min oxidation of aniline in EtOH/H<sub>2</sub>O (3:7) mixture.

**Figure S2.** FESEM images of the products prepared by the oxidation of aniline in (a) methanol/water (3:7, v/v) or (b) ethylene-glycol/water (3:7, v/v) mixed medium, other synthetic conditions are same to those in Fig. 1.

**Table S1.** A comparison of crystal violet adsorption performance of the as-prepared oligoaniline with other sorbent.

| sorbent                                                                                                         | type              | particle size                         | maximal uptake            | Refs.                                                |
|-----------------------------------------------------------------------------------------------------------------|-------------------|---------------------------------------|---------------------------|------------------------------------------------------|
| <i>(flower-on-leaf)-like oligoaniline</i>                                                                       | synthetic         | Hierarchical microstructures          | 350 mg g <sup>-1</sup>    | This study                                           |
| <i>coniferous pinus bark powder</i>                                                                             | natural           | 44 – 240 mesh screens                 | 8.9 mg g <sup>-1</sup>    | Journal of Hazardous Materials, 2009, 171, 767-773.  |
| <i>Activated Carbons Prepared from Rice Husk</i>                                                                | natural+modified  | mean pore radius 2.42 nm              | 64.875 mg g <sup>-1</sup> | Ind. Eng. Chem. Res. 2006, 45, 5165-5171.            |
| <i>Activated carbons derived from male flowers of coconut tree</i>                                              | natural+modified  | Surface area =328.2 m <sup>2</sup> /g | 60.42 mg g <sup>-1</sup>  | Journal of Hazardous Materials, 2006, B136, 800-808. |
| <i>Multi-walled carbon nanotubes decorated with Mn<sub>0.8</sub>Zn<sub>0.2</sub>Fe<sub>2</sub>O<sub>4</sub></i> | synthetic         | Surface area =59.8 m <sup>2</sup> /g. | ~5.0 mg g <sup>-1</sup>   | Chemical Engineering Journal, 2014, 255, 156-164.    |
| <i>Clay/poly(N-isopropylacrylamide) composite hydrogels</i>                                                     | natural+synthetic |                                       | 4.71 mg g <sup>-1</sup>   | Applied Clay Science, 2014, 90, 1-5.                 |
